# Supplementary material for: Ion Mobility Spectrometry as a Potential Tool for Flavor Control in Chocolate Manufacture
Source: PubMed Central journal article supplement (PMC6836128; doi:10.3390/foods8100460), 2019-10-09
Supplement: foods-08-00460-s001.pdf [file foods-08-00460-s001.pdf]

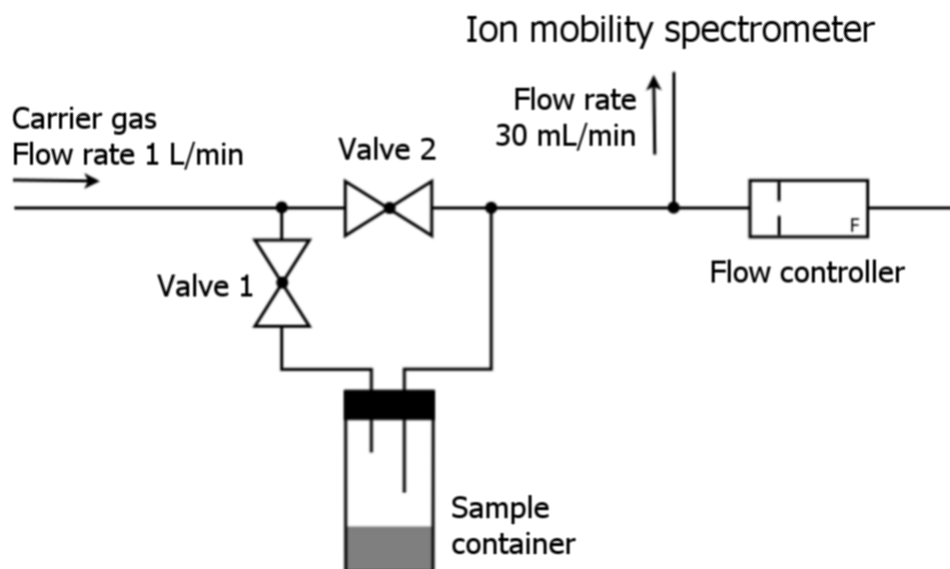

**Figure S1.** IMS sample inlet system. From M. Tzschoppe et al., Using ion mobility spectrometry for screening the autoxidation of peanuts, *Food Control* 2016, 64, 17–21, with permission from Elsevier.

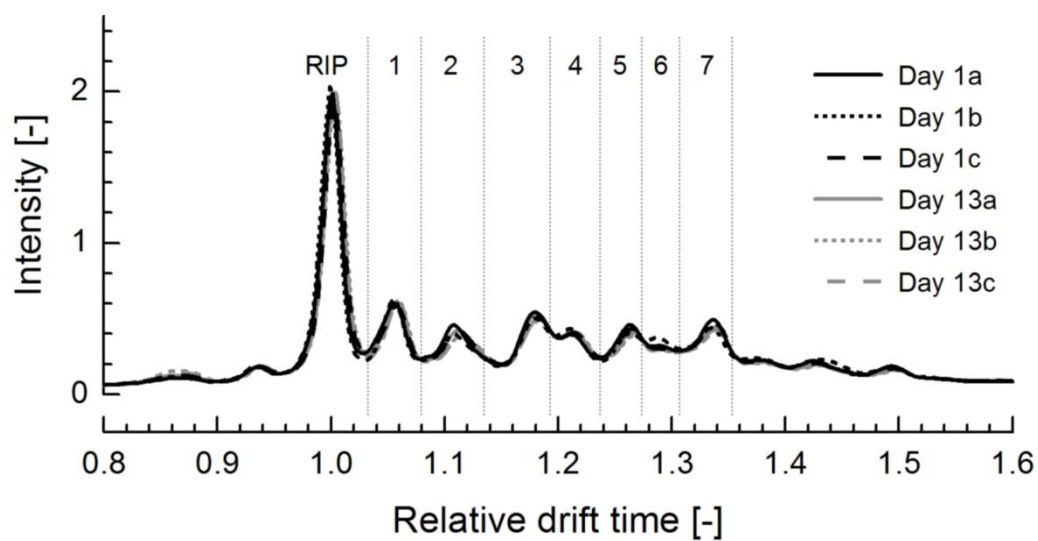

|                                              | Peak 1          | Peak 2          | Peak 3          | Peak 4          | Peak 5          | Peak 6          | Peak 7          |
|----------------------------------------------|-----------------|-----------------|-----------------|-----------------|-----------------|-----------------|-----------------|
| Peak area<br>[ $10^{-2} \cdot \text{A.U.}$ ] | $0.76 \pm 0.04$ | $0.57 \pm 0.04$ | $0.87 \pm 0.07$ | $0.45 \pm 0.06$ | $0.48 \pm 0.06$ | $0.17 \pm 0.04$ | $0.68 \pm 0.06$ |
| RSD [%]                                      | 5.7             | 6.3             | 8.5             | 13.3            | 11.7            | 23.5            | 8.5             |

**Figure S2.** IM spectra of cocoa liquor (used for testing purposes) that was measured repeatedly on several days. Peak areas in table are mean value  $\pm$  standard deviation ( $n = 6$ ) of the seven peaks in IM spectra.

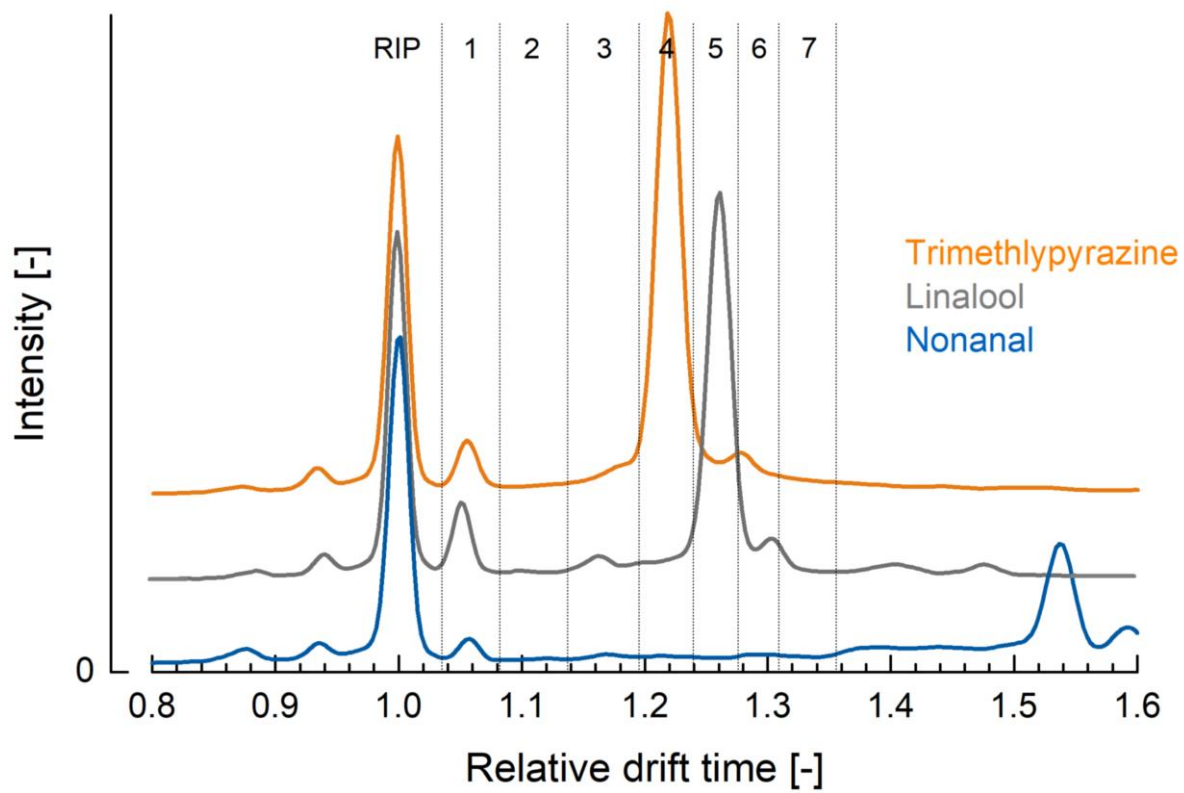

**Figure S3.** IM spectra of pure flavor compounds usually found on cocoa and chocolate. Intensity axis: RIP intensity for each compound is 2.0.

**Table S1.** Absolute peak areas of flavor compounds determined by HS-SPME-GC-MS (n = 2).

| Compound                            | Absolute peak area [ $10^4 \cdot \text{A.U.}$ ] |                       |                    |                        |                                         |
|-------------------------------------|-------------------------------------------------|-----------------------|--------------------|------------------------|-----------------------------------------|
|                                     | Fermented cocoa beans                           | Un-roasted cocoa nibs | Roasted cocoa nibs | Preground cocoa liquor | Finely ground, pre-treated cocoa liquor |
| Acetoin                             | 14.6                                            | 21.1                  | -                  | -                      | -                                       |
| 3-Methylbutan-1-ol                  | 44.5                                            | 12.6                  | -                  | -                      | -                                       |
| 2-Methylpropanoic acid              | 42.2                                            | -                     | -                  | -                      | -                                       |
| 2,3-Butanediol*                     | 28.5                                            | 22.5                  | 305.0              | 137.4                  | 76.1                                    |
| Pentyl acetate                      | 43.2                                            | 40.0                  | -                  | -                      | -                                       |
| 1-Butanol-3-methyl-acetate*         | 64.1                                            | 61.3                  | 37.7               | 89.1                   | -                                       |
| 1-Butanol-2-methyl-acetate          | 17.9                                            | 27.8                  | -                  | -                      | -                                       |
| 2-Heptanol                          | 46.5                                            | 17.8                  | -                  | -                      | -                                       |
| 2,5-Dimethylpyrazine                | -                                               | -                     | 36.6               | 26.0                   | 12.4                                    |
| 2,3-Dimethylpyrazine                | -                                               | -                     | 26.5               | 19.3                   | 14.7                                    |
| Benzaldehyde*                       | 34.2                                            | 100.6                 | 40.1               | 41.2                   | 36.2                                    |
| Beta-myrcene                        | 39.6                                            | 17.6                  | 8.7                | 9.0                    | 6.9                                     |
| 2-Ethyl-6-methylpyrazine            | -                                               | -                     | 3.1                | 3.1                    | 2.9                                     |
| Trimethylpyrazine*                  | 8.8                                             | 19.5                  | 79.0               | 59.9                   | 55.1                                    |
| Limonene                            | 3.7                                             | 6.1                   | 3.4                | 4.4                    | 4.6                                     |
| Phenylacetaldehyde                  | -                                               | -                     | 9.4                | 18.8                   | 20.6                                    |
| 2-Isobutyl-4,5-dimethyl-3-oxazoline | -                                               | -                     | 78.3               | -                      | -                                       |
| 1-(1H-Pyrrol-2-yl)ethanone          | -                                               | -                     | 11.8               | 20.5                   | 21.1                                    |
| Acetophenone*                       | 23.0                                            | 21.0                  | 20.1               | 21.4                   | 16.0                                    |
| 3-Ethyl-2,5-dimethylpyrazine        | -                                               | -                     | 13.9               | 16.0                   | 16.7                                    |
| Tetramethylpyrazine*                | 77.4                                            | 181.2                 | 281.2              | 276.8                  | 313.9                                   |
| 2-Nonanone                          | 15.0                                            | 29.6                  | 17.7               | 21.1                   | 19.5                                    |
| Linalool*                           | 21.6                                            | 35.1                  | 20.7               | 25.9                   | 26.7                                    |
| Nonanal*                            | 16.8                                            | 6.8                   | -                  | 2.9                    | 9.2                                     |
| 2-Isopropyl-5-methyl-2-hexenal      | -                                               | -                     | 78.6               | 13.8                   | -                                       |
| 2-Phenylethanol*                    | 71.1                                            | 87.8                  | 181.5              | 257.3                  | 169.1                                   |
| Massoia lactone                     | -                                               | -                     | 56.0               | 127.7                  | 65.1                                    |
| 2-Ethyl-3,5,6-trimethylpyrazine     | -                                               | 4.5                   | 11.7               | 11.1                   | 12.6                                    |
| Ethyl octanoate                     | 7.4                                             | 4.2                   | 5.0                | 7.9                    | 6.9                                     |
| 2-Phenethyl acetate*                | 29.1                                            | 56.2                  | 42.5               | 64.3                   | 65.8                                    |
| 5,6-Dihydro-2H-pyran-2-one          | -                                               | -                     | -                  | 11.0                   | 19.2                                    |
| 2-Phenyl-2-butenal                  | -                                               | 8.1                   | 11.0               | 21.4                   | 20.9                                    |
| Amyl benzoate                       | 10.0                                            | 12.0                  | 8.7                | 14.4                   | 15.7                                    |
| Caffeine                            | -                                               | -                     | -                  | 14.7                   | 10.8                                    |

\* Marked compounds are the selected volatiles for correlation analysis.
